# Supplementary material for: Noise-Induced Hearing Loss in Korean Workers: Co-Exposure to Organic Solvents and Heavy Metals in Nationwide Industries
Source: PubMed Central journal article supplement (PMC4037174; doi:10.1371/journal.pone.0097538), 2014-05-28
Supplement: pone.0097538.s001.pdf [file pone.0097538.s001.pdf]

**Figure S1.** Study participants profile.

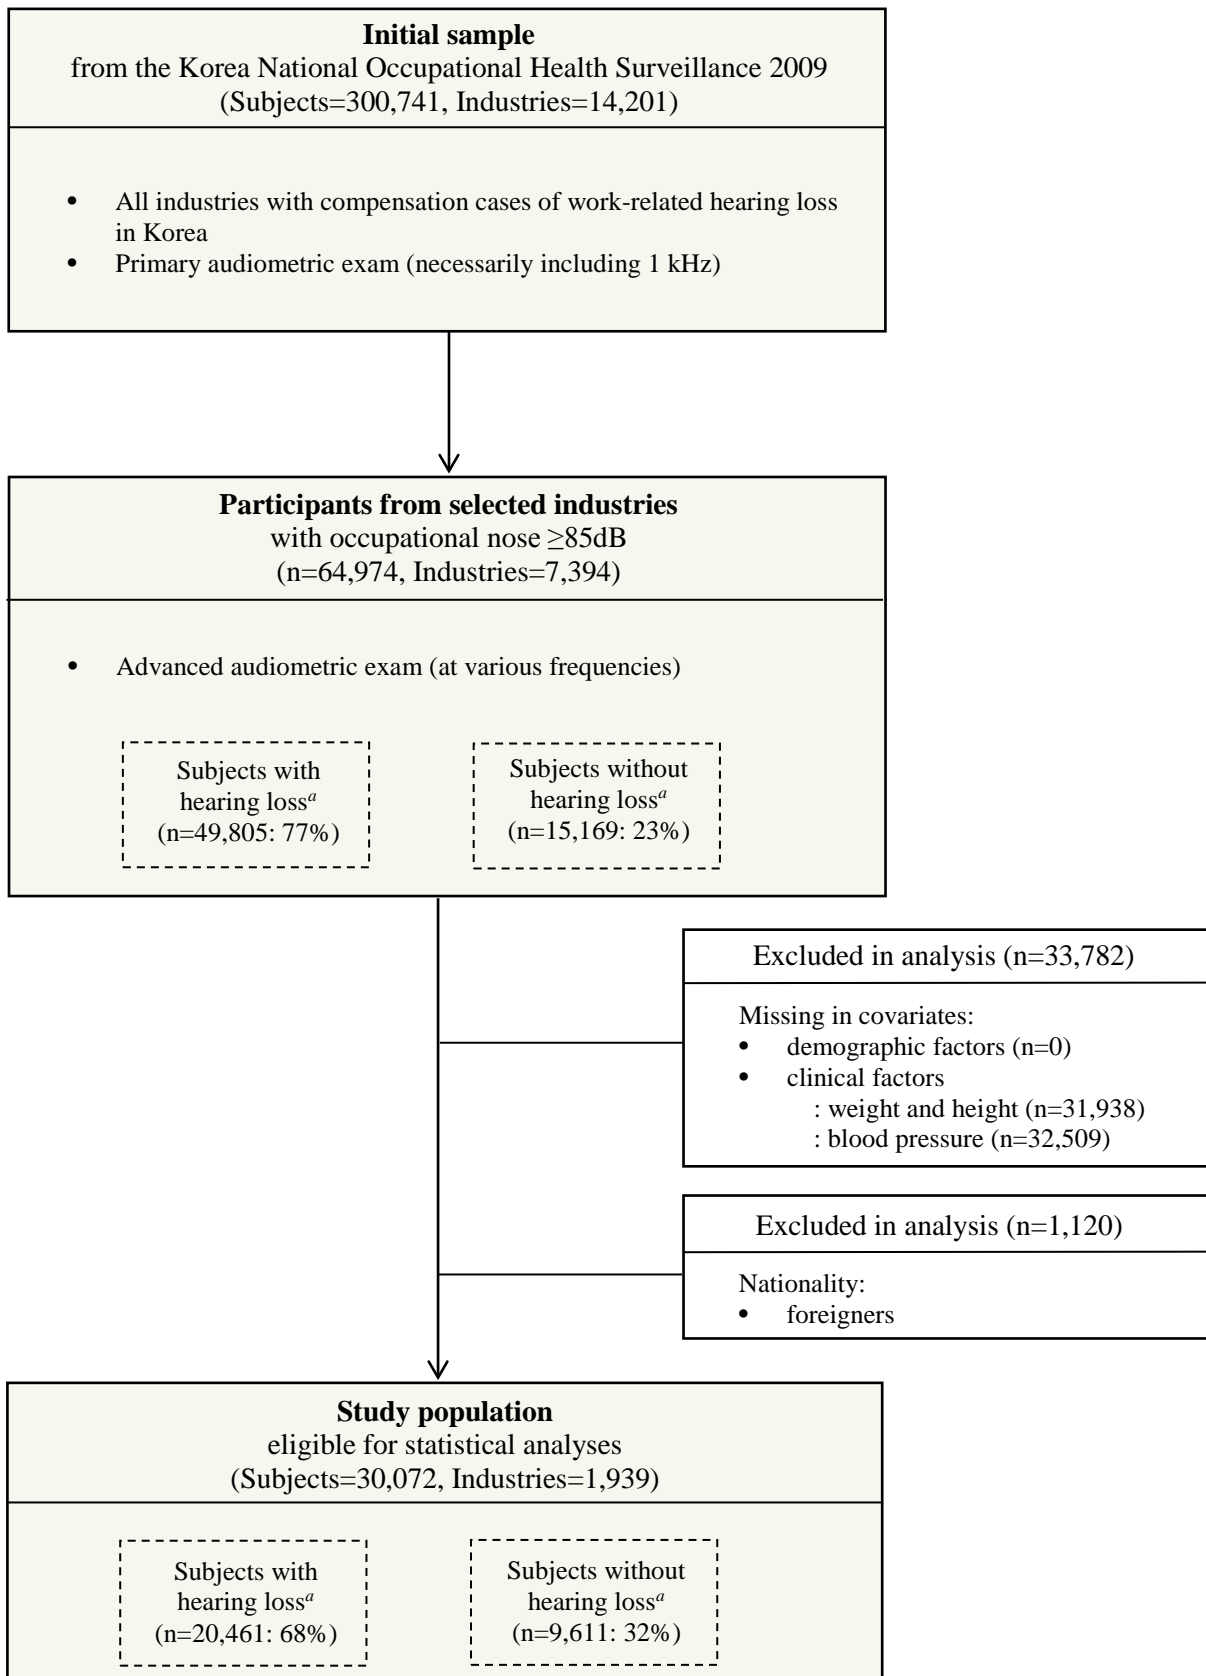

<sup>a</sup>Hearing loss (PTA at 2, 3, 4 kHz frequencies >25 dBHL)
