# Supplementary material for: Noise-Induced Hearing Loss in Korean Workers: Co-Exposure to Organic Solvents and Heavy Metals in Nationwide Industries
Source: PubMed Central journal article supplement (PMC4037174; doi:10.1371/journal.pone.0097538), 2014-05-28
Supplement: pone.0097538.s002.pdf [file pone.0097538.s002.pdf]

**Table S1.** Multivariate-adjusted effect estimates (95% CI) of hearing thresholds (dBHL) at individual frequencies with IQR increment in occupational noise exposure (dBA), stratified according to occupational exposure to ototoxic chemicals.

| Frequency<br>Stratification variable | Per noise IQR <sup>a</sup> |                 | p-value for<br>interaction |
|--------------------------------------|----------------------------|-----------------|----------------------------|
|                                      | Estimate                   | (95% CI)        |                            |
| 0.5kHz                               |                            |                 |                            |
| Heavy metals                         |                            |                 | <.001                      |
| <i>Non exposure</i>                  | 0.11                       | (-0.14, 0.36)   |                            |
| <i>Exposure</i>                      | -0.90                      | (-1.43, -0.38)* |                            |
| Organic chemicals                    |                            |                 | 0.185                      |
| <i>Non exposure</i>                  | -0.23                      | (-0.47, 0.02)*  |                            |
| <i>Exposure</i>                      | 0.34                       | (-0.44, 1.12)   |                            |
| 1kHz <sup>b</sup>                    |                            |                 |                            |
| Heavy metals                         |                            |                 | 0.283                      |
| <i>Non exposure</i>                  | 0.55                       | (0.27, 0.82)*   |                            |
| <i>Exposure</i>                      | 0.89                       | (0.29, 1.49)*   |                            |
| Organic chemicals                    |                            |                 | 0.249                      |
| <i>Non exposure</i>                  | 0.57                       | (0.31, 0.84)*   |                            |
| <i>Exposure</i>                      | 1.11                       | (0.28, 1.95)*   |                            |
| 2kHz                                 |                            |                 |                            |
| Heavy metals                         |                            |                 | <.001                      |
| <i>Non exposure</i>                  | 1.32                       | (1.00, 1.63)*   |                            |
| <i>Exposure</i>                      | 2.82                       | (2.12, 3.52)*   |                            |
| Organic chemicals                    |                            |                 | 0.099                      |
| <i>Non exposure</i>                  | 1.59                       | (1.29, 1.90)*   |                            |
| <i>Exposure</i>                      | 2.49                       | (1.56, 3.42)*   |                            |
| 3kHz                                 |                            |                 |                            |
| Heavy metals                         |                            |                 | 0.002                      |
| <i>Non exposure</i>                  | 2.60                       | (2.21, 2.99)*   |                            |
| <i>Exposure</i>                      | 3.98                       | (3.19, 4.77)*   |                            |
| Organic chemicals                    |                            |                 | 0.002                      |
| <i>Non exposure</i>                  | 2.74                       | (2.37, 3.11)*   |                            |
| <i>Exposure</i>                      | 4.79                       | (3.61, 5.97)*   |                            |
| 4kHz                                 |                            |                 |                            |
| Heavy metals                         |                            |                 | 0.051                      |
| <i>Non exposure</i>                  | 2.02                       | (1.61, 2.44)*   |                            |
| <i>Exposure</i>                      | 2.95                       | (2.16, 3.74)*   |                            |
| Organic chemicals                    |                            |                 | <.001                      |
| <i>Non exposure</i>                  | 1.85                       | (1.47, 2.24)*   |                            |
| <i>Exposure</i>                      | 6.00                       | (4.72, 7.29)*   |                            |
| 6kHz                                 |                            |                 |                            |
| Heavy metals                         |                            |                 | 0.120                      |
| <i>Non exposure</i>                  | 2.42                       | (1.96, 2.88)*   |                            |
| <i>Exposure</i>                      | 3.24                       | (2.34, 4.14)*   |                            |
| Organic chemicals                    |                            |                 | <.001                      |
| <i>Non exposure</i>                  | 2.19                       | (1.76, 2.62)*   |                            |
| <i>Exposure</i>                      | 6.51                       | (5.10, 7.92)*   |                            |

Models were adjusted for age, age<sup>2</sup>, sex, BMI, and hypertension, defined in Model C, Table 3.

CI, confidence interval

<sup>a</sup> PTA (dBHL) change per interquartile range (IQR) of occupational noise, 94.26 dBA - 84.74 dBA : 9.52 dBA

<sup>b</sup> Hearing thresholds at 1 kHz were obtained from primary audiometric tests.

\**p*<0.05
