# Supplementary material for: Noise-Induced Hearing Loss in Korean Workers: Co-Exposure to Organic Solvents and Heavy Metals in Nationwide Industries
Source: PubMed Central journal article supplement (PMC4037174; doi:10.1371/journal.pone.0097538), 2014-05-28
Supplement: pone.0097538.s003.pdf [file pone.0097538.s003.pdf]

**Table S2.** Multivariate-adjusted ORs (95% CIs) of hearing loss<sup>a</sup> with IQR increment in occupational noise exposure (dBA), stratified according to occupational exposure to ototoxic chemicals.

| Stratification variable | No, with hearing loss/<br>no. of participants (%) | Per noise IQR <sup>b</sup> |               | <i>p</i> -value for<br>interaction |
|-------------------------|---------------------------------------------------|----------------------------|---------------|------------------------------------|
|                         |                                                   | OR                         | (95% CI)      |                                    |
| Overall                 | 20461/30072 (68.0)                                | 1.52                       | (1.44, 1.60)* |                                    |
| Heavy metals            |                                                   |                            |               | <0.001                             |
| <i>Non exposure</i>     | 14583/22164 (65.8)                                | 1.46                       | (1.38, 1.54)* |                                    |
| <i>Exposure</i>         | 5878/7908 (74.3)                                  | 1.72                       | (1.52, 1.94)* |                                    |
| Organic chemicals       |                                                   |                            |               | <0.001                             |
| <i>Non exposure</i>     | 18922/27382 (69.1)                                | 1.43                       | (1.36, 1.51)* |                                    |
| <i>Exposure</i>         | 1539/2690 (57.2)                                  | 2.43                       | (2.01, 2.93)* |                                    |

Models were adjusted for age, age<sup>2</sup>, sex, BMI, and hypertension, defined in Model C, Table 3.

OR, odd ratio

CI, confidence interval

<sup>a</sup> Hearing Loss (PTA at 2, 3, 4 KHz frequencies > 25 dBHL)

<sup>b</sup> PTA (dBHL) change per interquartile range (IQR) of occupational noise, 94.26 dBA - 84.74 dBA : 9.52 dBA

\**p*<0.05
