# Supplementary material for: Noise-Induced Hearing Loss in Korean Workers: Co-Exposure to Organic Solvents and Heavy Metals in Nationwide Industries
Source: PubMed Central journal article supplement (PMC4037174; doi:10.1371/journal.pone.0097538), 2014-05-28
Supplement: pone.0097538.s004.pdf [file pone.0097538.s004.pdf]

**Table S3.** Multivariate-adjusted effect estimates (95% CIs) of hearing thresholds (dBHL) attributable to occupational exposure to ototoxic chemicals, stratified according to noise exposure levels (dBA).

| Ototoxic chemicals      |                     | By Ototoxic chemicals <sup>a</sup> |                 | <i>p</i> -value for interaction |
|-------------------------|---------------------|------------------------------------|-----------------|---------------------------------|
| Stratification variable | No. of participants | Estimate                           | (95% CI)        |                                 |
| <b>Heavy metals</b>     |                     |                                    |                 |                                 |
| Overall                 | 30072               | 0.88                               | (0.50, 1.26)*   |                                 |
| Noise <sup>b</sup>      |                     |                                    |                 |                                 |
| <i>Low exposure</i>     | 10010               | -0.61                              | (-1.25, 0.04)   | <i>(Ref)</i>                    |
| <i>Middle exposure</i>  | 10057               | 0.38                               | (-0.30, 1.06)   | <i>0.066</i>                    |
| <i>High exposure</i>    | 10005               | 2.42                               | (1.77, 3.06)*   | <i>&lt;0.001</i>                |
| <b>Organic solvents</b> |                     |                                    |                 |                                 |
| Overall                 | 30072               | 0.24                               | (0.21, 0.27)*   |                                 |
| Noise <sup>b</sup>      |                     |                                    |                 |                                 |
| <i>Low exposure</i>     | 10010               | -2.20                              | (-2.92, -1.48)* | <i>(Ref)</i>                    |
| <i>Middle exposure</i>  | 10057               | 2.29                               | (0.94, 3.64)*   | <i>&lt;0.001</i>                |
| <i>High exposure</i>    | 10005               | -1.39                              | (-2.64, -0.14)* | <i>0.251</i>                    |

Models were adjusted for age, age<sup>2</sup>, sex, BMI, and hypertension, defined in Model C, Table 3.

CI, confidence interval

<sup>a</sup> PTA (dBHL) change by exposure to heavy metals and organic solvents (vs. non exposure)

<sup>b</sup> Occupational noise exposure tertiles cut-off points: 86.6, 92.69 dBA

\**p*<0.05
